# Supplementary material for: Genetics of physiological dysregulation: findings from the long life family study using joint models
Source: publisher site journal article supplement (doi:10.18632/aging.102987), 2020-04-01
Supplement: Supplementary file [file aging-v12i7-102987-supplementary-material-SD1.pdf]

SUPPLEMENTARY FIGURES

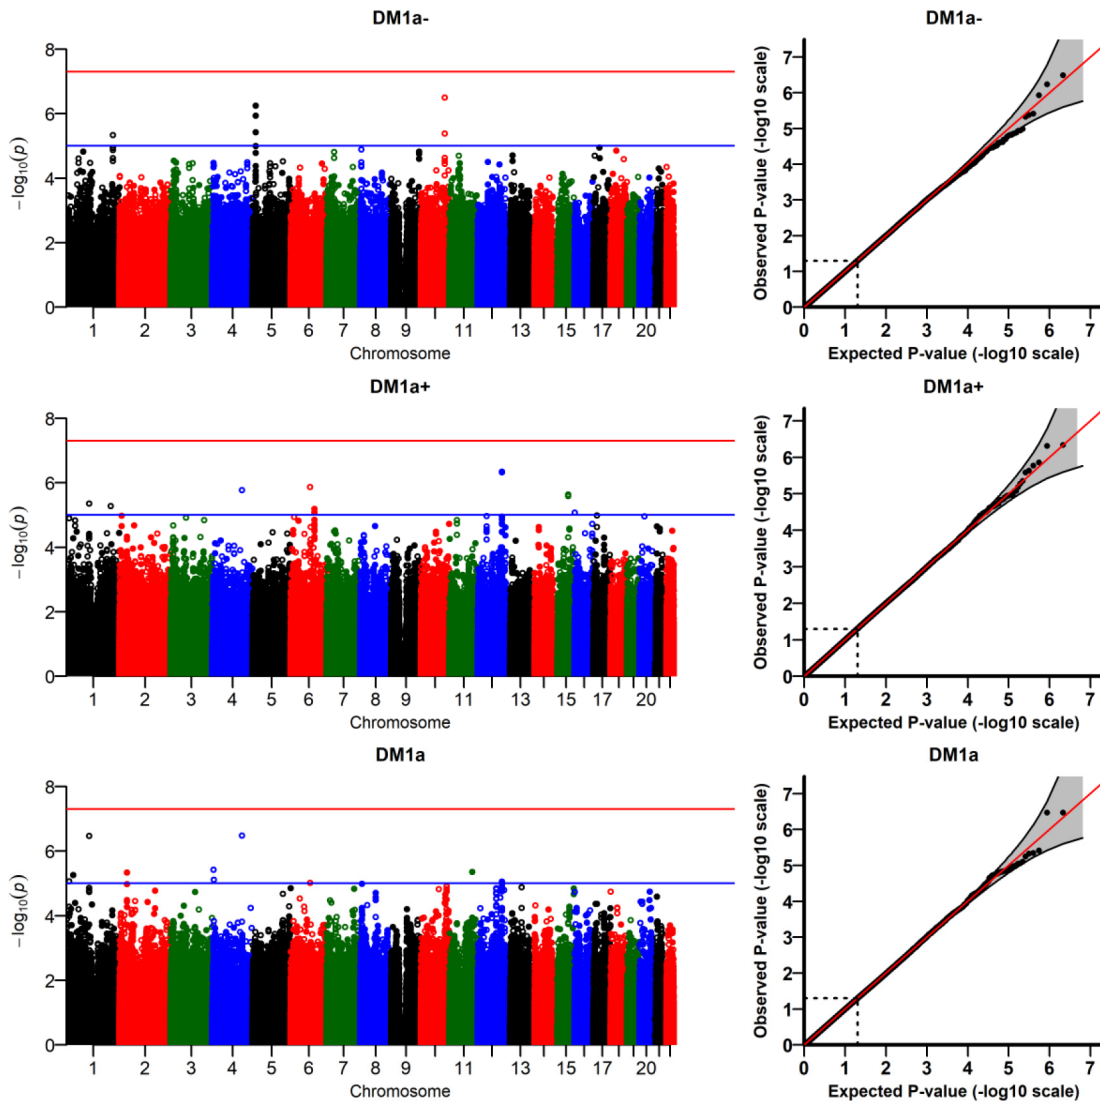

Supplementary Figure 1. Results of genome-wide association study of random intercepts of  $D_M$  ( $D_M$ -RI) for “age-dependent”  $D_M$  variants ( $D_{Ma}^{1-}$ ,  $D_{Ma}^{1+}$ ,  $D_{Ma}^1$ ; see Materials and Methods).

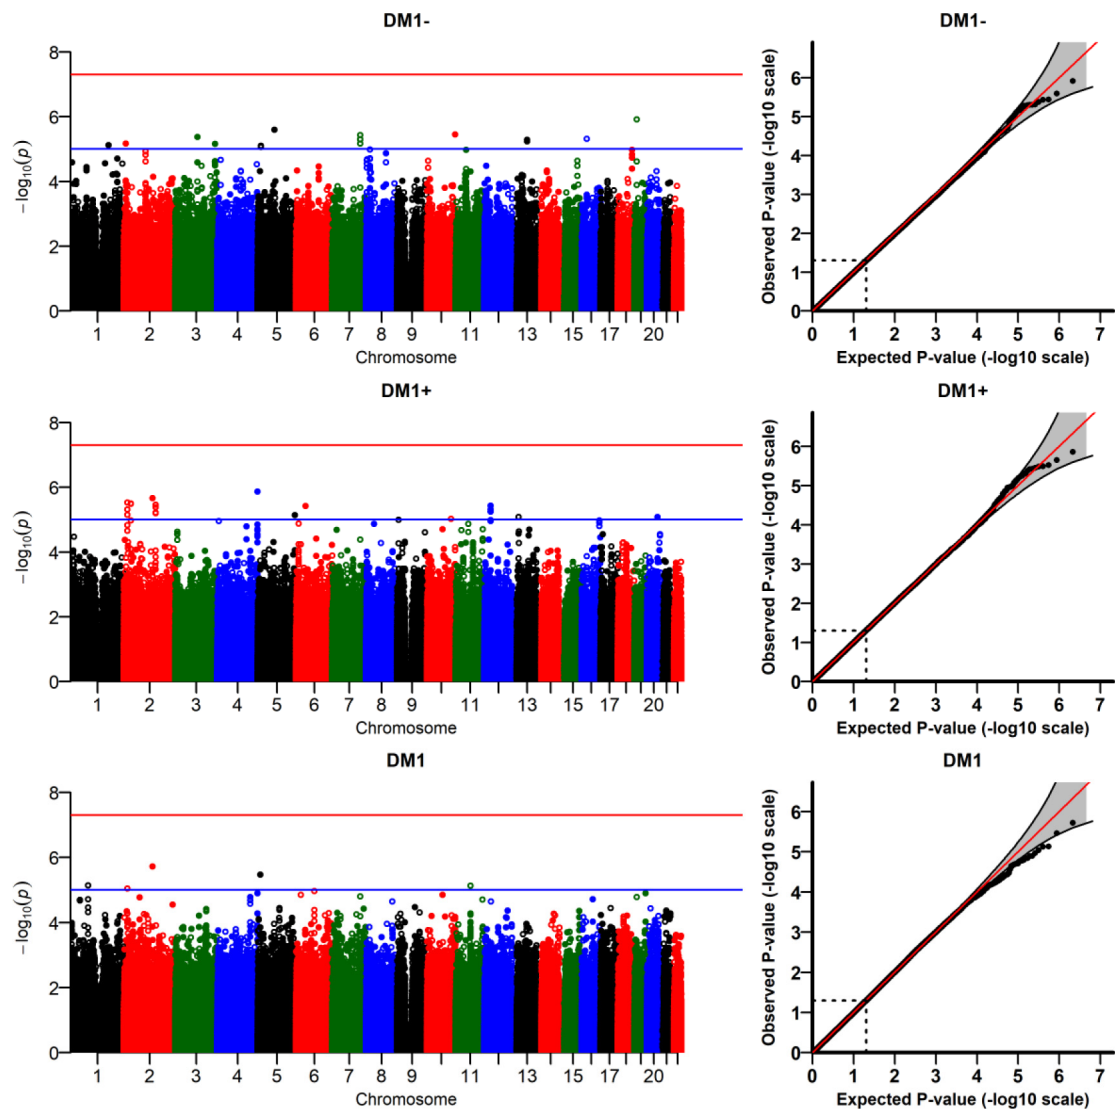

Supplementary Figure 2. Results of genome-wide association study of random slopes of  $D_M$  ( $D_M$ -RS) for “original”  $D_M$  variants ( $D_M^{1-}$ ,  $D_M^{1+}$ ,  $D_M^1$ ; see Materials and Methods).

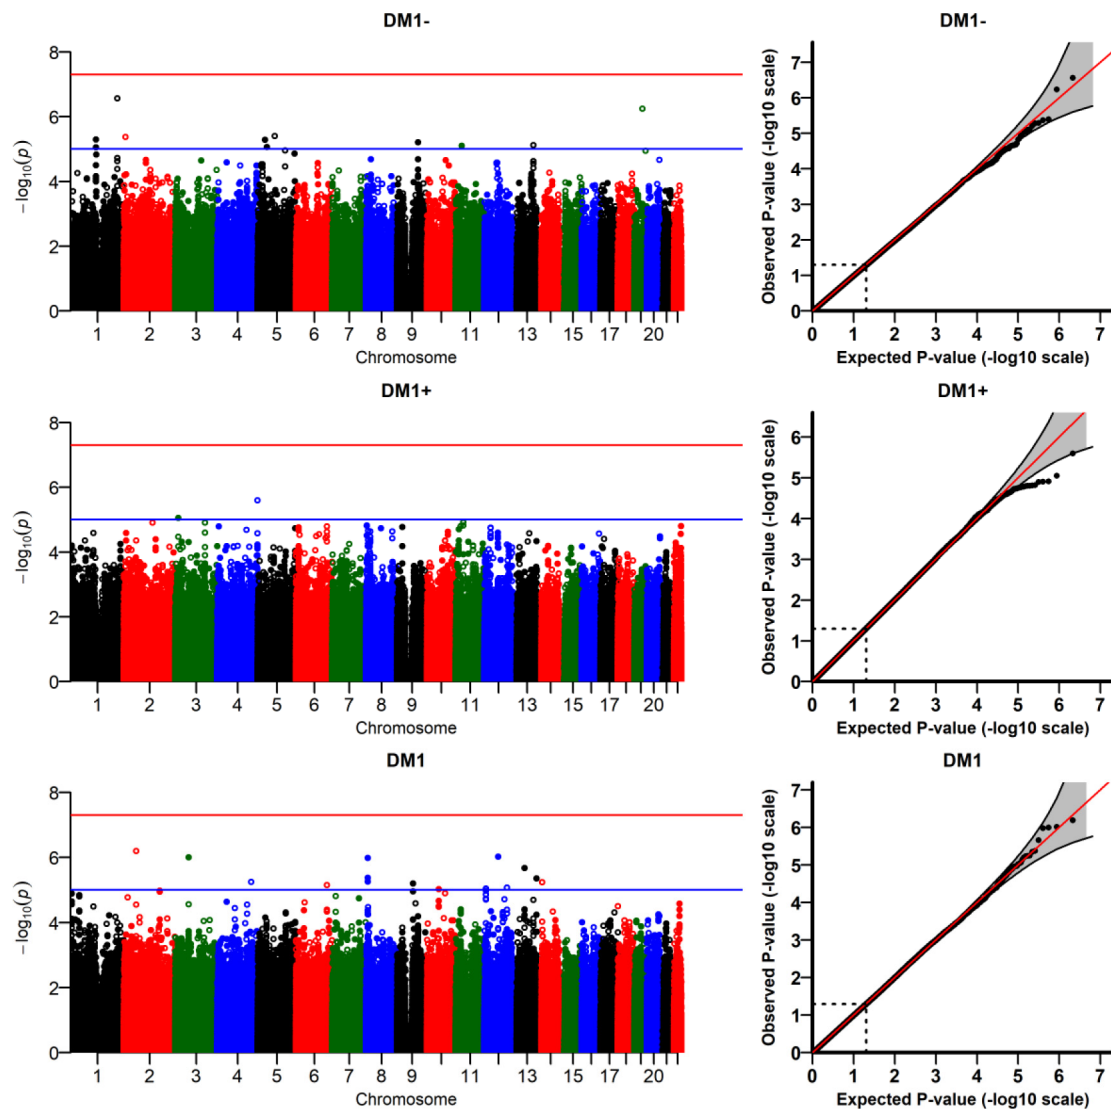

Supplementary Figure 3. Results of genome-wide association study of random intercepts of  $D_M$  ( $D_M$ -RI) for “original”  $D_M$  variants ( $D_M^{1-}$ ,  $D_M^{1+}$ ,  $D_M^1$ ; see Materials and Methods).

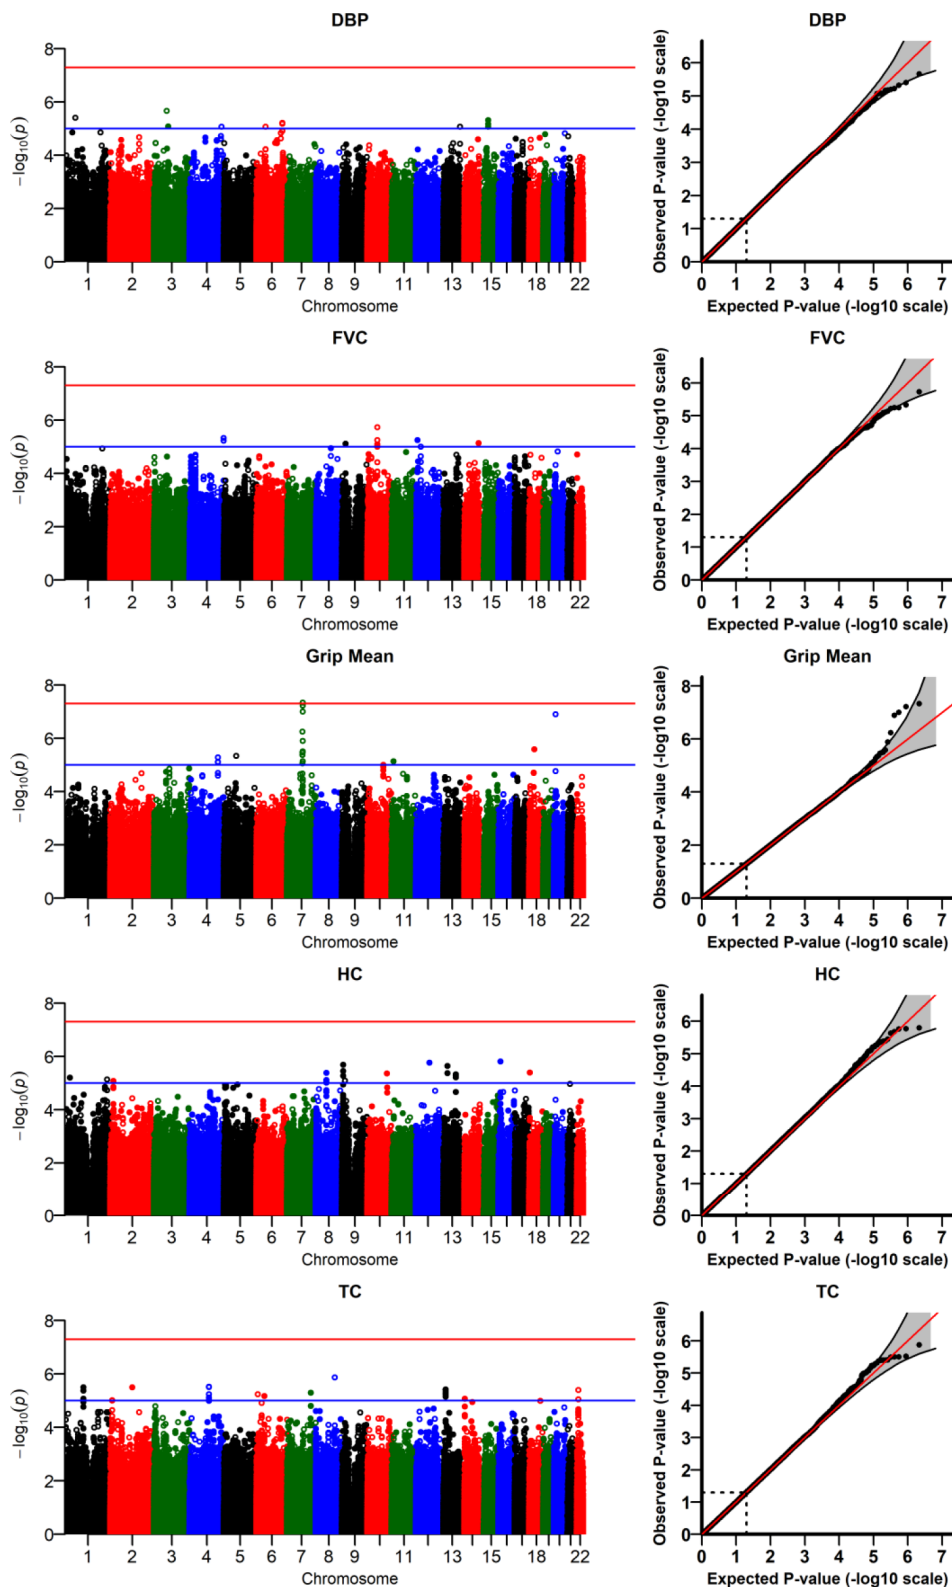

**Supplementary Figure 4. Results of genome-wide association study of random slopes of  $D_M$  ( $D_M$ -RS) constructed for separate biomarkers constituting  $D_{Ma}^{I-}$  (see Materials and Methods).** Notes: DBP: diastolic blood pressure; FVC: forced vital capacity; Grip Mean: mean grip strength; HC: hematocrit; TC: total cholesterol. For HC, the original scale of the biomarker was used due to non-convergence of joint model for the Box-Cox transformed scale.

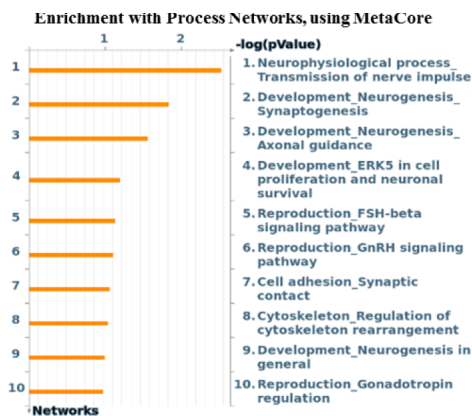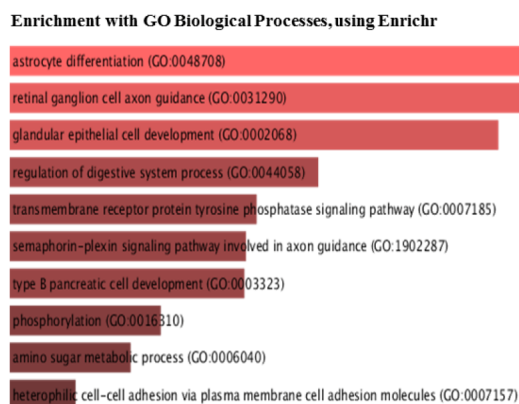

**Enrichment analysis of GO processes, using MetaScape**

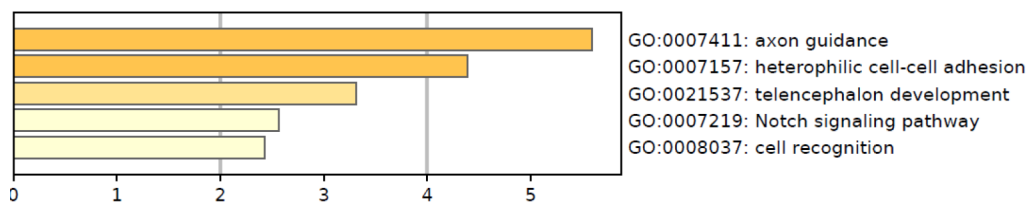

**Supplementary Figure 5. Examples of pathway/process enrichment for the 36 genes corresponding to the top 100 SNPs from the GWAS of the  $D_M$ -RS for the "age-dependent"  $D_M$ , using different enrichment tools.** Left top: Enrichment with Process Networks, using MetaCore [1]. N.B.: The content of these cellular/molecular processes is manually annotated and defined by Clarivate Analytics scientists (<https://clarivate.com/products/metacore/>). Right top: Enrichment with the Gene Ontology (GO) Biological Processes, using Enrichr (<https://amp.pharm.mssm.edu/Enrichr/>; [2]). Bottom: Enrichment with the Gene Ontology (GO) Processes, using MetaScape (<http://metascape.org/gp/index.html#/main/step1>).

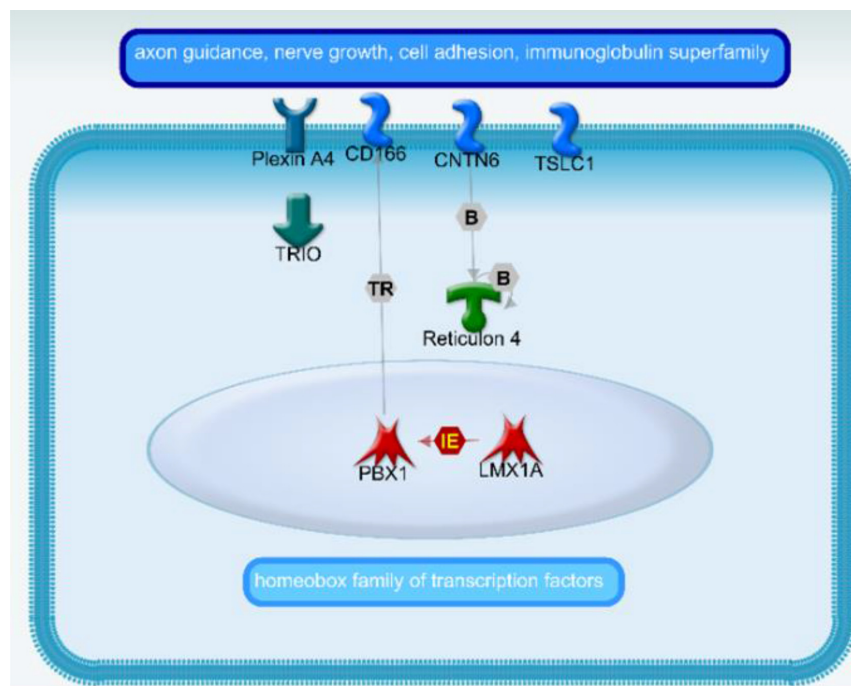

**Supplementary Figure 6. Involvement of products of the genes associated with slopes of  $D_M$  in functionally related biological processes (explanation in Discussion).**
