# Supplementary material for: Genetics of physiological dysregulation: findings from the long life family study using joint models
Source: publisher site journal article supplement (doi:10.18632/aging.102987), 2020-04-01
Supplement: Supplementary file [file aging-v12i7-102987-supplementary-material-SD2.pdf]

## SUPPLEMENTARY TABLES

**Supplementary Table 1. Top-ranked variants found in genome-wide association study of random slopes of  $D_M$  constructed for grip strength (see Supplementary Figure 4).**

| SNP         | Chr | Position  | A1 | A2 | MAF  | P-val (GC)           | Closest Gene | Gene Region           |
|-------------|-----|-----------|----|----|------|----------------------|--------------|-----------------------|
| rs10231286  | 7   | 85967146  | C  | T  | 0.14 | $4.6 \times 10^{-8}$ | GRM3         | Intergenic/5' of GRM3 |
| rs2037877   | 7   | 86066709  | C  | T  | 0.14 | $5.9 \times 10^{-8}$ | GRM3         | Intergenic/5' of GRM3 |
| rs2373213   | 7   | 85990327  | G  | A  | 0.14 | $9.9 \times 10^{-8}$ | GRM3         | Intergenic/5' of GRM3 |
| rs2423401   | 20  | 9649074   | T  | C  | 0.12 | $1.3 \times 10^{-7}$ | PAK7         | Intron                |
| rs17160578  | 7   | 85672109  | A  | G  | 0.14 | $5.7 \times 10^{-7}$ | GRM3         | Intergenic/5' of GRM3 |
| rs9969120   | 7   | 85990367  | G  | A  | 0.32 | $1.3 \times 10^{-6}$ | GRM3         | Intergenic/5' of GRM3 |
| rs117882408 | 18  | 28482872  | C  | T  | 0.02 | $2.6 \times 10^{-6}$ | DSC3         | Intergenic/3' of DSC3 |
| rs10255211  | 7   | 86124483  | C  | T  | 0.39 | $3.1 \times 10^{-6}$ | GRM3         | Intergenic/5' of GRM3 |
| rs2708580   | 7   | 85890669  | G  | A  | 0.15 | $3.3 \times 10^{-6}$ | GRM3         | Intergenic/5' of GRM3 |
| rs79576017  | 7   | 85744649  | A  | G  | 0.15 | $3.5 \times 10^{-6}$ | GRM3         | Intergenic/5' of GRM3 |
| rs73382292  | 7   | 85730104  | C  | T  | 0.15 | $4.3 \times 10^{-6}$ | GRM3         | Intergenic/5' of GRM3 |
| rs76915606  | 5   | 68769560  | G  | A  | 0.10 | $4.6 \times 10^{-6}$ | OCLN         | Intergenic/5' of OCLN |
| rs10030044  | 4   | 157011923 | G  | T  | 0.38 | $5.3 \times 10^{-6}$ | CTSO         | Intergenic/5' of CTSO |
| rs2708582   | 7   | 85893683  | C  | T  | 0.15 | $7.4 \times 10^{-6}$ | GRM3         | Intergenic/5' of GRM3 |
| rs10769988  | 11  | 9071175   | T  | C  | 0.25 | $7.4 \times 10^{-6}$ | SCUBE2       | Intron                |
| rs4417922   | 4   | 157006346 | C  | T  | 0.32 | $7.8 \times 10^{-6}$ | CTSO         | Intergenic/5' of CTSO |
| rs11722256  | 4   | 156994724 | T  | G  | 0.32 | $8.0 \times 10^{-6}$ | CTSO         | Intergenic/5' of CTSO |
| rs12668989  | 7   | 85662201  | C  | T  | 0.15 | $8.9 \times 10^{-6}$ | GRM3         | Intergenic/5' of GRM3 |
| rs11201991  | 10  | 88117122  | C  | T  | 0.30 | $1.0 \times 10^{-5}$ | GRID1        | Intron                |
| rs7904985   | 10  | 88116479  | A  | G  | 0.30 | $1.2 \times 10^{-5}$ | GRID1        | Intron                |

**Supplementary Table 2. The list of the thirty-six genes (in alphabetical order) corresponding to the top 100 SNPs found in GWAS of the  $D_M$ -RS.**

7SK, AGAP1, ALCAM, ANO4, BMP2K, C2orf48, CADM1, CDC42BPA, CDH4, CDK15, CDK6, CNTN6, EIF3H, ELMOD1, FNBP1, GPC5, GRIK2, LEUTX, LMX1A, MACROD2, NBEAL2, PBX1, PCDH9, PLXNA4, RNF150, RSP04, RTN4, SGK1, ST6GAL1, STXBP6, SYNE1, TCERG1L, THSD7B, TRIO, UBE2E2, UTP23.

**Supplementary Table 3. Information on biomarkers measured in the LLFS (number of measurements at each visit, correlations with age and pairwise correlations between biomarkers, p-values for testing the null hypothesis of a zero correlation, and number of observations used for computation of correlations).**
