# Supplementary material for: Genetics of physiological dysregulation: findings from the long life family study using joint models
Source: publisher site journal article supplement (doi:10.18632/aging.102987), 2020-04-01
Supplement: Supplementary file [file aging-v12i7-102987-supplementary-material-SD4.pdf]

## SUPPLEMENTARY REFERENCES

1. Dubovenko A, Nikolsky Y, Rakhmatulin E and Nikolskaya T. Functional Analysis of OMICs Data and Small Molecule Compounds in an Integrated “Knowledge-Based” Platform. In: Tatarinova TV and Nikolsky Y, eds. Biological Networks and Pathway Analysis. (New York, NY: Springer New York), 2017. pp. 101–124.  
[https://doi.org/10.1007/978-1-60761-175-2\\_10](https://doi.org/10.1007/978-1-60761-175-2_10)
2. Kuleshov MV, Jones MR, Rouillard AD, Fernandez NF, Duan Q, Wang Z, Koplev S, Jenkins SL, Jagodnik KM, Lachmann A, McDermott MG, Monteiro CD, Gundersen GW, Ma'ayan A. Enrichr: a comprehensive gene set enrichment analysis web server 2016 update. *Nucleic Acids Res.* 2016; 44:W90–7.  
<https://doi.org/10.1093/nar/gkw377>  
[PMID:27141961](https://pubmed.ncbi.nlm.nih.gov/27141961/)
