# Supplementary material for: Genetics of physiological dysregulation: findings from the long life family study using joint models
Source: Aging (Albany NY). 2020 Apr 1;12(7):5920–47. doi: 10.18632/aging.102987 (PMC7185144; doi:10.18632/aging.102987)
Supplement: Supplementary Table 3 [file aging-12-102987-s002..xlsx]

## Sheet: Table
Variable		Number of observations			Correlations
Abbreviation	Name (Unit of Measurement)	Visit 1	Visit 2	Total	Age	abas	Adip	aeos	Albumin	alym	amon	aneu	BG	BMI	Creatinine	Cysc	d2	d3	DBP	DHEA	epi	ferritin	FEV1	FVC	GRIP_MEAN	HC	HDLC	Hgb	HmbA1c	hscrp	IGF1	Il6	insulin	LDLC	mch	mchc	MCV	ntbnpe	plt	PP	PR	rbc	rdw	SBP	SHBGE	srage	TC	teststrn	TG
Age	Age at visit (years)	4899	2876	7775	1	0.0273	0.31805	0.07892	-0.36035	0.00323	0.21519	0.22091	0.09449	-0.1205	0.29064	0.63166	0.07542	-0.10751	-0.24777	-0.42924	-0.10422	0.03551	-0.62708	-0.59551	-0.52124	-0.26968	-0.08627	-0.32596	0.18291	0.14957	-0.15567	0.21105	-0.01995	-0.18211	0.04686	-0.14968	0.17559	0.38037	-0.09461	0.46571	-0.02658	-0.33168	0.26879	0.25528	0.28055	0.26256	-0.19799	-0.06661	-0.02685
abas	Absolute basophil counts (10e9/L)	4195	1899	6094	0.0273	1	0.01556	0.19655	-0.02756	0.05136	0.1362	0.14787	0.08422	0.01391	-0.04132	0.02451	-0.01163	-0.00919	-0.0168	0.02184	0.00151	-0.0125	-0.03279	-0.02848	-0.01942	0.02939	0.00665	0.02552	0.02608	0.16366	-0.03746	0.02171	0.00332	0.04429	-0.01343	0.00368	-0.01317	0.0229	0.15642	0.06171	0.03355	0.03435	0.01874	0.04241	0.02997	-0.00292	0.04461	-0.03304	0.01279
Adip	Adiponectin (ng/mL)	4452	0	4452	0.31805	0.01556	1	-0.03937	-0.11506	-0.06653	-0.00632	-0.01491	-0.11997	-0.32749	0.02091	0.20253	0.01248	0.08325	-0.12299	-0.21721	0.00466	-0.06434	-0.35414	-0.34202	-0.38366	-0.29257	0.42046	-0.31793	-0.09321	-0.0018	-0.09647	0.0628	-0.23241	-0.04359	0.03597	-0.0926	0.10915	0.26296	0.03358	0.14267	0.04067	-0.3278	0.18637	0.05362	0.4836	0.22008	0.05327	-0.24835	-0.25796
aeos	Absolute eosinophil count (10e9/L)	4410	2234	6644	0.07892	0.19655	-0.03937	1	-0.07479	0.07697	0.20141	0.10775	0.07122	0.0354	0.11144	0.11978	0.0129	-0.01908	0.00543	-0.02078	-0.04345	0.00568	-0.03057	-0.00513	0.03418	-0.01528	-0.09225	0.00112	0.08251	0.07361	-0.02683	0.03349	0.03166	-0.00812	0.00239	0.02438	-0.02747	0.04737	0.09887	0.03985	-0.00188	0.00164	0.03048	0.03607	-0.02321	0.00897	-0.0284	0.09059	0.0559
Albumin	Albumin (g/dL)	4642	0	4642	-0.36035	-0.02756	-0.11506	-0.07479	1	0.05069	-0.12442	-0.14555	-0.0237	-0.02186	-0.15311	-0.33155	-0.003	0.13162	0.14194	0.21288	0.11829	0.03006	0.30678	0.29187	0.29076	0.31692	0.0701	0.36415	-0.14187	-0.26973	0.08894	-0.20714	-0.018	0.11587	0.09723	0.15861	-0.00751	-0.25662	-0.00492	-0.13026	-0.00551	0.29418	-0.19737	-0.03359	-0.16403	-0.16564	0.13517	0.12298	0.03482
alym	Absolute lymphocyte counts (10e9/L)	4496	2251	6747	0.00323	0.05136	-0.06653	0.07697	0.05069	1	0.14492	0.03178	0.01561	0.03526	-0.013	0.00383	0.01298	-0.01929	0.01347	-0.01239	-0.00459	-0.00244	-0.03462	-0.03752	-0.01308	0.02038	-0.06043	0.01965	0.04337	-0.02519	0.01116	-0.02583	0.03581	0.00318	-0.01208	-0.00022	-0.02057	-0.04199	0.03981	0.00538	0.02479	0.03125	0.00783	0.01165	-0.03033	-0.03429	-0.00674	-0.0313	0.05071
amon	Absolute monocyte count (10e9/L)	4495	2252	6747	0.21519	0.1362	-0.00632	0.20141	-0.12442	0.14492	1	0.29765	0.09458	0.0304	0.12582	0.21292	-0.00575	-0.06237	-0.02566	-0.02745	-0.03551	0.04901	-0.11323	-0.08881	-0.04146	-0.01189	-0.13775	-0.00597	0.12543	0.1653	-0.03962	0.14301	0.02852	-0.07452	-0.00974	0.01781	-0.02451	0.10199	0.07909	0.12446	0.02997	0.0047	0.10693	0.09001	-0.00946	0.03547	-0.10621	0.07431	0.04874
aneu	Absolute neutrophil count (10e9/L)	4495	2249	6744	0.22091	0.14787	-0.01491	0.10775	-0.14555	0.03178	0.29765	1	0.04293	0.11263	0.15131	0.2552	0.04623	-0.0401	-0.07102	-0.08327	-0.02324	0.03783	-0.19626	-0.19016	-0.14128	0.00253	-0.20069	-0.0523	0.19962	0.29808	-0.02793	0.24459	0.12066	-0.13751	-0.06283	-0.12312	0.03407	0.1723	0.21093	0.09883	0.11289	-0.01331	0.18355	0.04451	-0.05435	0.05674	-0.16868	-0.01932	0.11238
BG	Glucose (mg/dL)	4206	2369	6575	0.09449	0.08422	-0.11997	0.07122	-0.0237	0.01561	0.09458	0.04293	1	0.18779	0.04385	0.07675	-0.00289	-0.12761	0.06747	0.03639	-0.10793	0.12565	0.02222	0.02639	0.0792	0.02112	-0.11708	0.09338	0.27229	0.0628	0.01166	0.05351	0.39293	0.01934	0.06773	0.16773	-0.05727	0.04248	-0.03304	0.11557	0.0599	0.05095	-0.0406	0.13061	-0.13536	-0.06936	0.0066	0.09471	0.14544
BMI	Body mass index (kg/m2)	4659	2707	7366	-0.1205	0.01391	-0.32749	0.0354	-0.02186	0.03526	0.0304	0.11263	0.18779	1	0.02824	0.00608	-0.00718	-0.13581	0.10101	0.01734	-0.06798	0.05872	0.0293	-0.01464	0.13778	0.14121	-0.33966	0.12965	0.22716	0.101	0.07505	-0.01304	0.39231	-0.01794	-0.09095	-0.00786	-0.07864	-0.10387	-0.01362	0.01943	0.07707	0.16938	0.03204	0.06981	-0.38143	-0.13444	-0.0757	0.00149	0.28549
Creatinine	Creatinine (mg/dL)	4658	2615	7273	0.29064	-0.04132	0.02091	0.11144	-0.15311	-0.013	0.12582	0.15131	0.04385	0.02824	1	0.74821	0.02908	-0.0122	-0.06003	-0.04829	-0.06738	0.09908	-0.02698	-0.00506	0.06987	-0.08809	-0.24857	-0.10556	0.09031	0.09909	-0.00686	0.13847	0.02904	-0.08248	0.03424	-0.07512	0.09089	0.38647	-0.13987	0.05782	-0.08311	-0.12132	0.17128	0.01614	-0.10535	0.31714	-0.1511	0.23726	0.09518
Cysc	Cystatin (mg/L)	4642	0	4642	0.63166	0.02451	0.20253	0.11978	-0.33155	0.00383	0.21292	0.2552	0.07675	0.00608	0.74821	1	0.05127	-0.08146	-0.194	-0.26048	-0.112	0.07288	-0.43643	-0.41699	-0.3389	-0.25769	-0.20905	-0.33012	0.19316	0.19328	-0.08073	0.26018	0.04793	-0.15208	-0.02145	-0.19972	0.14078	0.53727	-0.08558	0.28867	-0.00109	-0.30461	0.30817	0.13664	0.09974	0.41428	-0.18382	-0.03406	0.08245
d2	Vitamin D2 (ng/mL)	4540	0	4540	0.07542	-0.01163	0.01248	0.0129	-0.003	0.01298	-0.00575	0.04623	-0.00289	-0.00718	0.02908	0.05127	1	-0.16972	-0.03321	-0.05486	-0.04793	-0.03512	-0.08213	-0.08427	-0.08143	-0.00468	-0.02075	-0.02635	-0.00249	0.00071	0.0072	0.02802	-0.00043	-0.03944	-0.00823	-0.03684	0.02882	0.01548	-0.0271	0.02035	-0.01559	-0.01943	0.02149	-0.00043	0.0096	0.02651	-0.03564	-0.02579	0.02117
d3	Vitamin D3 (ng/mL)	4616	0	4616	-0.10751	-0.00919	0.08325	-0.01908	0.13162	-0.01929	-0.06237	-0.0401	-0.12761	-0.13581	-0.0122	-0.08146	-0.16972	1	-0.03602	-0.03249	0.62413	-0.08398	0.03211	0.02864	-0.02374	0.01894	0.18094	-0.01781	-0.06206	-0.06318	0.02111	-0.08974	-0.09502	0.00487	0.00682	-0.08725	0.06743	-0.08329	0.05101	-0.05795	-0.04028	-0.02244	-0.06899	-0.06613	0.06846	0.03515	0.04728	-0.06703	-0.09689
DBP	Diastolic blood pressure (mmHg)	4757	2777	7534	-0.24777	-0.0168	-0.12299	0.00543	0.14194	0.01347	-0.02566	-0.07102	0.06747	0.10101	-0.06003	-0.194	-0.03321	-0.03602	1	0.1818	-0.01806	0.03498	0.22886	0.22465	0.27269	0.23679	-0.01424	0.30023	-0.08126	-0.04558	0.03384	-0.05626	0.0542	0.2073	0.01773	0.17128	-0.11559	-0.13033	0.03026	0.02774	0.17738	0.27189	-0.10839	0.55609	-0.1602	-0.11032	0.20214	0.12408	0.10723
DHEA	Dehydroepiandrosterone sulfate (ug/dL)	3915	0	3915	-0.42924	0.02184	-0.21721	-0.02078	0.21288	-0.01239	-0.02745	-0.08327	0.03639	0.01734	-0.04829	-0.26048	-0.05486	-0.03249	0.1818	1	0.00511	0.09571	0.42542	0.42714	0.41074	0.20839	-0.0089	0.28335	-0.13042	-0.06175	0.07157	-0.08566	-0.01036	0.13852	0.10614	0.16377	-0.02599	-0.1674	-0.00863	-0.18825	0.02907	0.20821	-0.17109	-0.05934	-0.23749	-0.13442	0.12226	0.25349	0.03215
epi	Vitamin D (epi-isomer) (ng/mL)	3474	0	3474	-0.10422	0.00151	0.00466	-0.04345	0.11829	-0.00459	-0.03551	-0.02324	-0.10793	-0.06798	-0.06738	-0.112	-0.04793	0.62413	-0.01806	0.00511	1	0.00749	0.03993	0.0336	0.02408	0.11585	0.1479	0.06102	-0.00331	-0.06345	0.0115	-0.07315	-0.04161	-0.11529	0.0226	-0.11521	0.11276	-0.0805	0.00991	-0.0396	-0.01844	0.04126	-0.04557	-0.04163	-0.00702	-0.00221	-0.04419	-0.01459	-0.02405
ferritin	Ferritin (ng/mL)	4339	0	4339	0.03551	-0.0125	-0.06434	0.00568	0.03006	-0.00244	0.04901	0.03783	0.12565	0.05872	0.09908	0.07288	-0.03512	-0.08398	0.03498	0.09571	0.00749	1	0.10134	0.09924	0.13984	0.06948	-0.11166	0.10523	-0.00761	0.07103	-0.00831	0.04632	0.08808	-0.00401	0.19874	0.08924	0.14464	0.04407	-0.11501	0.00427	0.02345	-0.00716	0.06638	0.02147	-0.0546	-0.02258	-0.0137	0.17412	0.11638
FEV1	Forced expiratory volume (mL)	4399	2354	6753	-0.62708	-0.03279	-0.35414	-0.03057	0.30678	-0.03462	-0.11323	-0.19626	0.02222	0.0293	-0.02698	-0.43643	-0.08213	0.03211	0.22886	0.42542	0.03993	0.10134	1	0.96742	0.72327	0.34425	-0.08991	0.42199	-0.17949	-0.16361	0.13178	-0.1628	0.00092	0.126	0.02496	0.20894	-0.1363	-0.29203	-0.0822	-0.35261	-0.11563	0.38274	-0.22228	-0.17068	-0.33485	-0.20547	0.06601	0.47264	0.00446
FVC	Forced vital capacity (mL)	4399	2353	6752	-0.59551	-0.02848	-0.34202	-0.00513	0.29187	-0.03752	-0.08881	-0.19016	0.02639	-0.01464	-0.00506	-0.41699	-0.08427	0.02864	0.22465	0.42714	0.0336	0.09924	0.96742	1	0.74755	0.35068	-0.08002	0.43362	-0.18149	-0.15239	0.12743	-0.14769	-0.02265	0.11874	0.04818	0.21848	-0.12138	-0.27977	-0.09486	-0.34535	-0.12345	0.38051	-0.22179	-0.16691	-0.32878	-0.19676	0.05749	0.51942	-0.01581
GRIP_MEAN	Grip strength (kg)	4731	2714	7445	-0.52124	-0.01942	-0.38366	0.03418	0.29076	-0.01308	-0.04146	-0.14128	0.0792	0.13778	0.06987	-0.3389	-0.08143	-0.02374	0.27269	0.41074	0.02408	0.13984	0.72327	0.74755	1	0.39984	-0.17491	0.48363	-0.10052	-0.12543	0.16971	-0.14243	0.06257	0.08271	0.05412	0.22347	-0.11766	-0.24391	-0.11991	-0.28507	-0.09611	0.42119	-0.17673	-0.09135	-0.39497	-0.22043	0.01224	0.56748	0.07632
HC	Hematocrit (%)	4522	2571	7093	-0.26968	0.02939	-0.29257	-0.01528	0.31692	0.02038	-0.01189	0.00253	0.02112	0.14121	-0.08809	-0.25769	-0.00468	0.01894	0.23679	0.20839	0.11585	0.06948	0.34425	0.35068	0.39984	1	-0.09154	0.90969	-0.00655	-0.12244	0.10346	-0.12271	0.07425	0.12329	0.02931	-0.05748	0.09859	-0.21881	-0.12498	-0.15035	-0.00583	0.83034	-0.15945	0.00098	-0.2843	-0.1768	0.09624	0.36307	0.11691
HDLC	High-density lipoprotein cholesterol (mg/dL)	4656	2613	7269	-0.08627	0.00665	0.42046	-0.09225	0.0701	-0.06043	-0.13775	-0.20069	-0.11708	-0.33966	-0.24857	-0.20905	-0.02075	0.18094	-0.01424	-0.0089	0.1479	-0.11166	-0.08991	-0.08002	-0.17491	-0.09154	1	-0.10001	-0.19739	-0.10369	-0.01622	-0.08007	-0.27297	0.05485	0.07126	-0.03463	0.0906	-0.06614	0.06006	0.02723	0.00708	-0.13786	-0.08324	0.0151	0.35627	0.01307	0.35948	-0.21986	-0.42964
Hgb	Hemoglobin (g/dL)	4520	2573	7093	-0.32596	0.02552	-0.31793	0.00112	0.36415	0.01965	-0.00597	-0.0523	0.09338	0.12965	-0.10556	-0.33012	-0.02635	-0.01781	0.30023	0.28335	0.06102	0.10523	0.42199	0.43362	0.48363	0.90969	-0.10001	1	-0.06044	-0.12947	0.11559	-0.13596	0.0942	0.16826	0.19416	0.34271	-0.03202	-0.25655	-0.15362	-0.1679	-0.01375	0.82204	-0.30624	0.02004	-0.29679	-0.21599	0.13159	0.41076	0.12335
HmbA1c	Glycosylated hemoglobin (%)	4626	2596	7222	0.18291	0.02608	-0.09321	0.08251	-0.14187	0.04337	0.12543	0.19962	0.27229	0.22716	0.09031	0.19316	-0.00249	-0.06206	-0.08126	-0.13042	-0.00331	-0.00761	-0.17949	-0.18149	-0.10052	-0.00655	-0.19739	-0.06044	1	0.07914	-0.01777	0.047	0.17644	-0.13108	-0.13109	-0.12387	-0.04183	0.10318	0.01995	0.12383	0.07952	0.01538	0.10028	0.05967	-0.13134	0.02046	-0.14521	-0.04071	0.17042
hscrp	High-sensitivity C-reactive protein (mg/L)	4450	0	4450	0.14957	0.16366	-0.0018	0.07361	-0.26973	-0.02519	0.1653	0.29808	0.0628	0.101	0.09909	0.19328	0.00071	-0.06318	-0.04558	-0.06175	-0.06345	0.07103	-0.16361	-0.15239	-0.12543	-0.12244	-0.10369	-0.12947	0.07914	1	-0.03828	0.41281	0.05226	-0.03745	-0.02316	-0.04544	0.00917	0.17043	0.07692	0.04419	0.09174	-0.11375	0.13351	0.01273	-0.03317	0.04235	-0.06641	-0.05814	0.01687
IGF1	Insulin-like growth factor 1 (ng/mL)	4439	0	4439	-0.15567	-0.03746	-0.09647	-0.02683	0.08894	0.01116	-0.03962	-0.02793	0.01166	0.07505	-0.00686	-0.08073	0.0072	0.02111	0.03384	0.07157	0.0115	-0.00831	0.13178	0.12743	0.16971	0.10346	-0.01622	0.11559	-0.01777	-0.03828	1	-0.02056	0.07213	0.01358	-0.00114	0.03976	-0.02866	-0.07886	-0.00113	-0.05673	0.00777	0.11304	-0.05826	-0.0292	-0.1419	-0.05598	0.01253	0.03433	0.02903
Il6	Interleukin 6 (pg/mL)	4593	0	4593	0.21105	0.02171	0.0628	0.03349	-0.20714	-0.02583	0.14301	0.24459	0.05351	-0.01304	0.13847	0.26018	0.02802	-0.08974	-0.05626	-0.08566	-0.07315	0.04632	-0.1628	-0.14769	-0.14243	-0.12271	-0.08007	-0.13596	0.047	0.41281	-0.02056	1	0.00348	-0.09151	0.00811	-0.04053	0.0505	0.23276	0.00478	0.06341	0.06699	-0.13854	0.16306	0.02312	0.04595	0.11072	-0.10939	-0.02631	0.00621
insulin	Insulin (pmol/L)	4591	0	4591	-0.01995	0.00332	-0.23241	0.03166	-0.018	0.03581	0.02852	0.12066	0.39293	0.39231	0.02904	0.04793	-0.00043	-0.09502	0.0542	-0.01036	-0.04161	0.08808	0.00092	-0.02265	0.06257	0.07425	-0.27297	0.0942	0.17644	0.05226	0.07213	0.00348	1	-0.03509	-0.03277	0.05975	-0.07764	-0.05029	-0.01621	0.01572	0.11209	0.11142	0.01619	0.04072	-0.21574	-0.07571	-0.03742	-0.04341	0.33495
LDLC	Low-density lipoprotein cholesterol (mg/dL)	4615	2601	7216	-0.18211	0.04429	-0.04359	-0.00812	0.11587	0.00318	-0.07452	-0.13751	0.01934	-0.01794	-0.08248	-0.15208	-0.03944	0.00487	0.2073	0.13852	-0.11529	-0.00401	0.126	0.11874	0.08271	0.12329	0.05485	0.16826	-0.13108	-0.03745	0.01358	-0.09151	-0.03509	1	-0.04786	0.11123	-0.14502	-0.15651	0.11613	-0.01621	0.0667	0.18363	-0.12031	0.09684	-0.02309	-0.04816	0.91638	-0.03489	0.13722
mch	Mean corpuscular hemoglobin (pg)	4520	2567	7087	0.04686	-0.01343	0.03597	0.00239	0.09723	-0.01208	-0.00974	-0.06283	0.06773	-0.09095	0.03424	-0.02145	-0.00823	0.00682	0.01773	0.10614	0.0226	0.19874	0.02496	0.04818	0.05412	0.02931	0.07126	0.19416	-0.13109	-0.02316	-0.00114	0.00811	-0.03277	-0.04786	1	0.42363	0.72836	0.00917	-0.14296	-0.01866	-0.01506	-0.37524	-0.25348	-0.00618	0.03292	-0.00764	-0.02175	0.14092	-0.03229
mchc	Mean corpuscular hemoglobin concentration (g/dL)	4168	2559	6727	-0.14968	0.00368	-0.0926	0.02438	0.15861	-0.00022	0.01781	-0.12312	0.16773	-0.00786	-0.07512	-0.19972	-0.03684	-0.08725	0.17128	0.16377	-0.11521	0.08924	0.20894	0.21848	0.22347	-0.05748	-0.03463	0.34271	-0.12387	-0.04544	0.03976	-0.04053	0.05975	0.11123	0.42363	1	-0.26865	-0.12748	-0.0924	-0.05523	-0.01689	0.0898	-0.38374	0.04416	-0.04782	-0.10856	0.08505	0.14277	0.02846
MCV	Mean corpuscular volume (fl)	4519	2569	7088	0.17559	-0.01317	0.10915	-0.02747	-0.00751	-0.02057	-0.02451	0.03407	-0.05727	-0.07864	0.09089	0.14078	0.02882	0.06743	-0.11559	-0.02599	0.11276	0.14464	-0.1363	-0.12138	-0.11766	0.09859	0.0906	-0.03202	-0.04183	0.00917	-0.02866	0.0505	-0.07764	-0.14502	0.72836	-0.26865	1	0.11741	-0.09324	0.0254	-0.00014	-0.46033	-0.00514	-0.04042	0.07144	0.08298	-0.0985	0.04416	-0.04845
ntbnpe	N-terminal pro b-type natriuretic peptide (pg/mL)	4584	0	4584	0.38037	0.0229	0.26296	0.04737	-0.25662	-0.04199	0.10199	0.1723	0.04248	-0.10387	0.38647	0.53727	0.01548	-0.08329	-0.13033	-0.1674	-0.0805	0.04407	-0.29203	-0.27977	-0.24391	-0.21881	-0.06614	-0.25655	0.10318	0.17043	-0.07886	0.23276	-0.05029	-0.15651	0.00917	-0.12748	0.11741	1	-0.08033	0.16117	-0.00928	-0.25687	0.28136	0.06487	0.12739	0.35198	-0.16934	-0.04463	-0.03684
plt	Platelets (10e9/L)	4514	2554	7068	-0.09461	0.15642	0.03358	0.09887	-0.00492	0.03981	0.07909	0.21093	-0.03304	-0.01362	-0.13987	-0.08558	-0.0271	0.05101	0.03026	-0.00863	0.00991	-0.11501	-0.0822	-0.09486	-0.11991	-0.12498	0.06006	-0.15362	0.01995	0.07692	-0.00113	0.00478	-0.01621	0.11613	-0.14296	-0.0924	-0.09324	-0.08033	1	-0.00147	0.16326	-0.05894	0.08767	0.01489	0.06186	-0.05391	0.1358	-0.20536	0.02729
PP	Pulse pressure (mmHg)	4757	2777	7534	0.46571	0.06171	0.14267	0.03985	-0.13026	0.00538	0.12446	0.09883	0.11557	0.01943	0.05782	0.28867	0.02035	-0.05795	0.02774	-0.18825	-0.0396	0.00427	-0.35261	-0.34535	-0.28507	-0.15035	0.02723	-0.1679	0.12383	0.04419	-0.05673	0.06341	0.01572	-0.01621	-0.01866	-0.05523	0.0254	0.16117	-0.00147	1	-0.14578	-0.14713	0.05203	0.84623	0.13518	0.11964	0.01299	-0.14683	0.03841
PR	Pulse rate (bpm)	4756	2776	7532	-0.02658	0.03355	0.04067	-0.00188	-0.00551	0.02479	0.02997	0.11289	0.0599	0.07707	-0.08311	-0.00109	-0.01559	-0.04028	0.17738	0.02907	-0.01844	0.02345	-0.11563	-0.12345	-0.09611	-0.00583	0.00708	-0.01375	0.07952	0.09174	0.00777	0.06699	0.11209	0.0667	-0.01506	-0.01689	-0.00014	-0.00928	0.16326	-0.14578	1	-0.00349	0.05713	-0.02651	0.02097	-0.01547	0.08896	-0.1284	0.09935
rbc	Red blood cell count (10e12/L)	4519	2572	7091	-0.33168	0.03435	-0.3278	0.00164	0.29418	0.03125	0.0047	-0.01331	0.05095	0.16938	-0.12132	-0.30461	-0.01943	-0.02244	0.27189	0.20821	0.04126	-0.00716	0.38274	0.38051	0.42119	0.83034	-0.13786	0.82204	0.01538	-0.11375	0.11304	-0.13854	0.11142	0.18363	-0.37524	0.0898	-0.46033	-0.25687	-0.05894	-0.14713	-0.00349	1	-0.12321	0.0223	-0.30055	-0.20679	0.13298	0.31224	0.13466
rdw	Red cell distribution width (%)	4506	2569	7075	0.26879	0.01874	0.18637	0.03048	-0.19737	0.00783	0.10693	0.18355	-0.0406	0.03204	0.17128	0.30817	0.02149	-0.06899	-0.10839	-0.17109	-0.04557	0.06638	-0.22228	-0.22179	-0.17673	-0.15945	-0.08324	-0.30624	0.10028	0.13351	-0.05826	0.16306	0.01619	-0.12031	-0.25348	-0.38374	-0.00514	0.28136	0.08767	0.05203	0.05713	-0.12321	1	-0.01435	0.11755	0.13119	-0.13213	-0.06106	0.0222
SBP	Systolic blood pressure (mmHg)	4758	2777	7535	0.25528	0.04241	0.05362	0.03607	-0.03359	0.01165	0.09001	0.04451	0.13061	0.06981	0.01614	0.13664	-0.00043	-0.06613	0.55609	-0.05934	-0.04163	0.02147	-0.17068	-0.16691	-0.09135	0.00098	0.0151	0.02004	0.05967	0.01273	-0.0292	0.02312	0.04072	0.09684	-0.00618	0.04416	-0.04042	0.06487	0.01489	0.84623	-0.02651	0.0223	-0.01435	1	0.0282	0.04122	0.11843	-0.05674	0.08894
SHBGE	Sex-hormone binding globulin (nmol/L)	4641	0	4641	0.28055	0.02997	0.4836	-0.02321	-0.16403	-0.03033	-0.00946	-0.05435	-0.13536	-0.38143	-0.10535	0.09974	0.0096	0.06846	-0.1602	-0.23749	-0.00702	-0.0546	-0.33485	-0.32878	-0.39497	-0.2843	0.35627	-0.29679	-0.13134	-0.03317	-0.1419	0.04595	-0.21574	-0.02309	0.03292	-0.04782	0.07144	0.12739	0.06186	0.13518	0.02097	-0.30055	0.11755	0.0282	1	0.1482	0.04903	-0.2216	-0.24257
srage	Soluble receptor for advanced glycation endproduct (pg/mL)	4643	0	4643	0.26256	-0.00292	0.22008	0.00897	-0.16564	-0.03429	0.03547	0.05674	-0.06936	-0.13444	0.31714	0.41428	0.02651	0.03515	-0.11032	-0.13442	-0.00221	-0.02258	-0.20547	-0.19676	-0.22043	-0.1768	0.01307	-0.21599	0.02046	0.04235	-0.05598	0.11072	-0.07571	-0.04816	-0.00764	-0.10856	0.08298	0.35198	-0.05391	0.11964	-0.01547	-0.20679	0.13119	0.04122	0.1482	1	-0.0451	-0.07998	-0.0371
TC	Total cholesterol (mg/dL)	4658	2613	7271	-0.19799	0.04461	0.05327	-0.0284	0.13517	-0.00674	-0.10621	-0.16868	0.0066	-0.0757	-0.1511	-0.18382	-0.03564	0.04728	0.20214	0.12226	-0.04419	-0.0137	0.06601	0.05749	0.01224	0.09624	0.35948	0.13159	-0.14521	-0.06641	0.01253	-0.10939	-0.03742	0.91638	-0.02175	0.08505	-0.0985	-0.16934	0.1358	0.01299	0.08896	0.13298	-0.13213	0.11843	0.04903	-0.0451	1	-0.12618	0.19307
teststrn	Testosterone (ng/dL)	4586	0	4586	-0.06661	-0.03304	-0.24835	0.09059	0.12298	-0.0313	0.07431	-0.01932	0.09471	0.00149	0.23726	-0.03406	-0.02579	-0.06703	0.12408	0.25349	-0.01459	0.17412	0.47264	0.51942	0.56748	0.36307	-0.21986	0.41076	-0.04071	-0.05814	0.03433	-0.02631	-0.04341	-0.03489	0.14092	0.14277	0.04416	-0.04463	-0.20536	-0.14683	-0.1284	0.31224	-0.06106	-0.05674	-0.2216	-0.07998	-0.12618	1	-0.00987
TG	Triglycerides (mg/dL)	4658	2613	7271	-0.02685	0.01279	-0.25796	0.0559	0.03482	0.05071	0.04874	0.11238	0.14544	0.28549	0.09518	0.08245	0.02117	-0.09689	0.10723	0.03215	-0.02405	0.11638	0.00446	-0.01581	0.07632	0.11691	-0.42964	0.12335	0.17042	0.01687	0.02903	0.00621	0.33495	0.13722	-0.03229	0.02846	-0.04845	-0.03684	0.02729	0.03841	0.09935	0.13466	0.0222	0.08894	-0.24257	-0.0371	0.19307	-0.00987	1
transferrin	Transferrin receptor (mg/L)	4452	0	4452	0.13864	0.00943	0.07035	0.01572	-0.07547	-0.01615	0.07584	0.14515	-0.01129	0.06437	0.1208	0.18445	0.02787	-0.01218	-0.04587	-0.1163	0.00107	-0.09021	-0.12422	-0.12929	-0.10947	-0.11593	-0.10454	-0.20291	0.00552	0.11318	-0.00702	0.09614	0.0737	-0.08036	-0.36053	-0.23186	-0.22903	0.14659	0.03165	0.037	0.03945	0.02996	0.45584	0.00676	0.00561	0.11631	-0.08945	-0.05287	0.0752
WBC	White blood cell count (10e9/L)	4521	2555	7076	0.17014	0.21036	-0.05832	0.22092	-0.08251	0.71314	0.40698	0.70449	0.05285	0.10215	0.10207	0.20393	0.03885	-0.04778	-0.0439	-0.06694	-0.02483	0.03158	-0.15828	-0.15219	-0.09772	0.02098	-0.1912	-0.01493	0.18283	0.20472	-0.01877	0.16001	0.10788	-0.09629	-0.05194	-0.07864	0.00405	0.09863	0.17621	0.08545	0.08676	0.01976	0.13873	0.04774	-0.05647	0.00992	-0.12758	-0.02073	0.11812
[truncated: 96 more columns]

## Sheet: Notes
Correlations are indicated by color gradient: blue represents positive correlation, red represents negative correlation
